# Supplementary material
Source: PubMed Central journal article supplement (PMC4065181)
Supplement: epi-9-834-s01.pdf [file epi-9-834-s01.pdf]

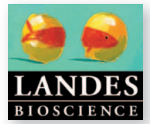

## **Supplemental Material to:**

**Yasunao F Kamikawa and Mary E Donohoe**

**The localization of histone H3K27me3 demethylase Jmjd3  
is dynamically regulated**

**Epigenetics 2014; 9(6)**

**<http://dx.doi.org/10.4161/epi.28524>**

**[https://www.landesbioscience.com/journals/epigenetics/  
article/28524/](https://www.landesbioscience.com/journals/epigenetics/article/28524/)**

**A**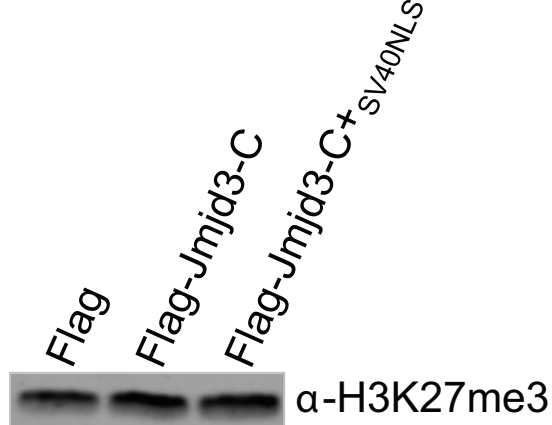**B**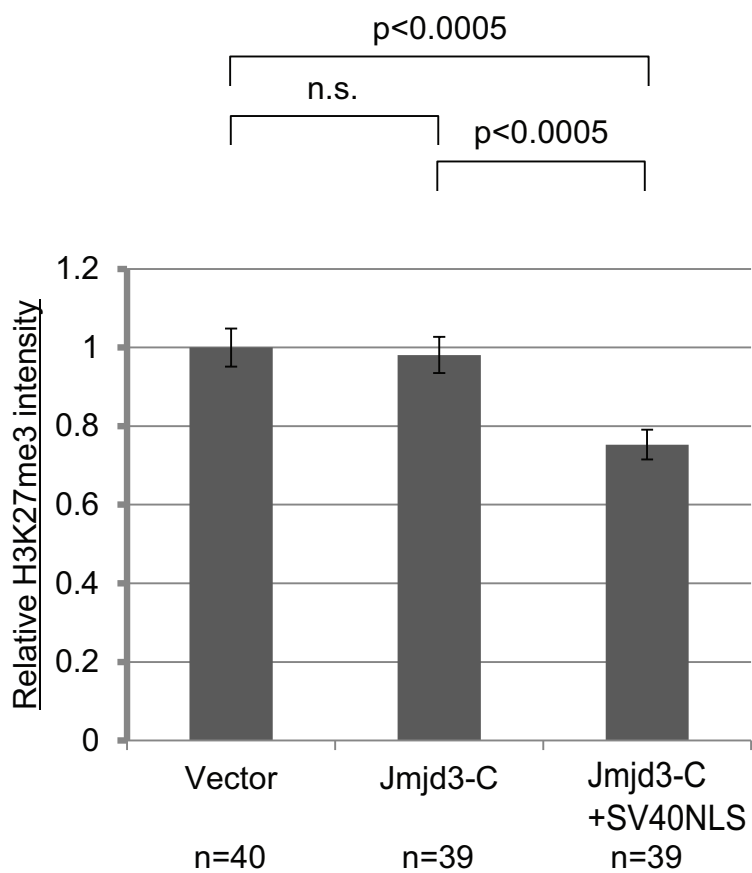

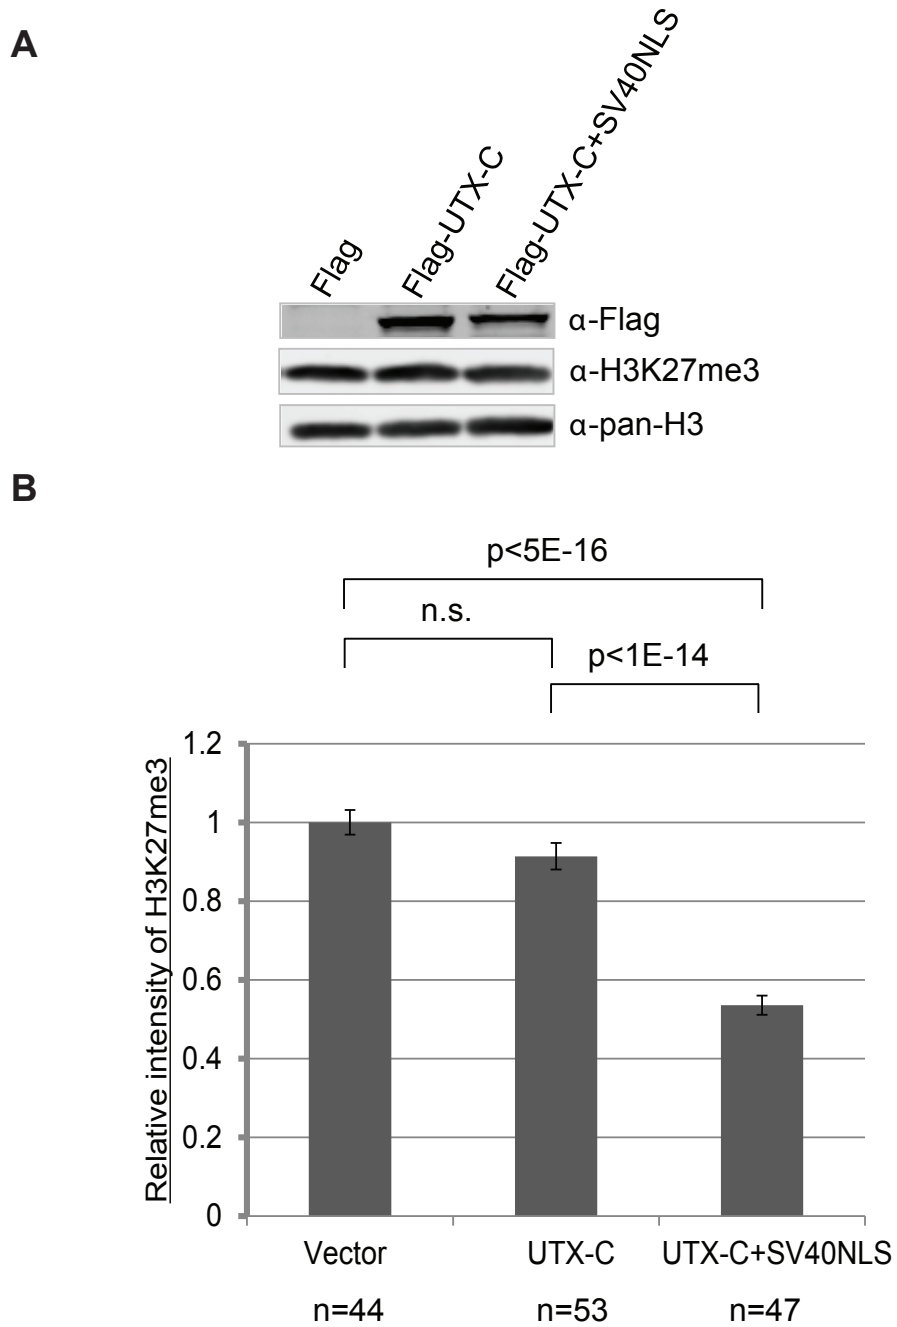

R=0.017

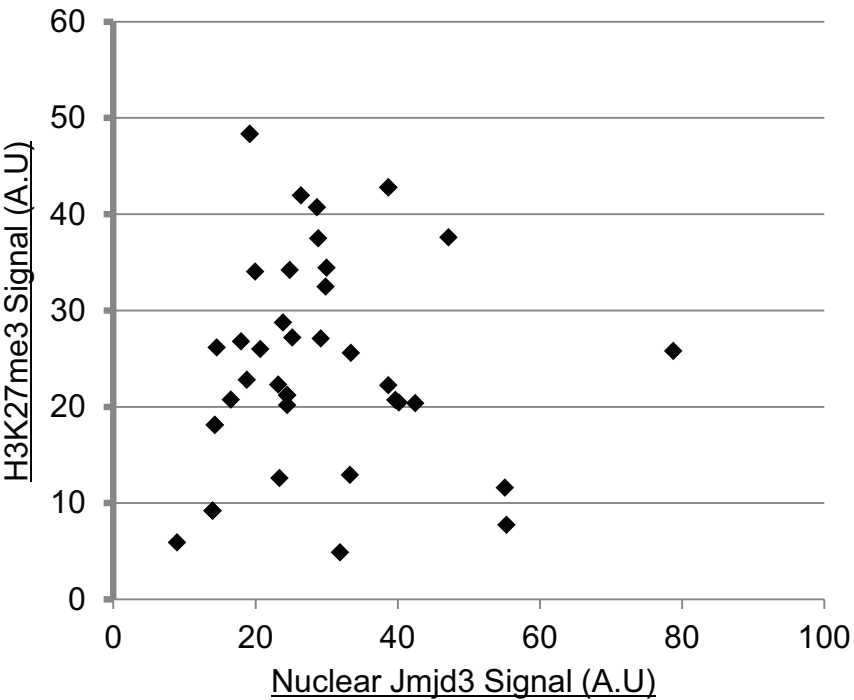

n=40

## Supplemental Figure Legends

### Figure S1.

**(A)** The total H3K27me3 levels were not altered by either the over expression of Jmjd3-C or Jmjd3-C+SV40NLS. Western blot of whole cell extracts prepared from Flag-alone, Flag-Jmjd3-C, and Flag-Jmjd3-C+SV40NLS shown in Figure 3A probed with anti-H3K27me3 antibodies. **(B)** An independent experiment and quantification of Figure 3B and C. The signal intensity of H3K27me3 in Jmjd3-C or Jmjd3-C+SV40NLS transfected cells was quantified. The values represent the mean of the individual transfectants. n= the total numbers of counted cells. The error bars represent one standard error. Statistics were performed using the Student's *t* test analysis.

### Figure S2.

**(A)** The expression of Flag-UTX-C and UTX-C+SV40NLS was confirmed by western blot using anti-Flag antibodies. Pan-H3 was used as a protein loading control. The total H3K27me3 levels were not altered by either over expression of UTX-C or UTX-C+SV40NLS. **(B)** An independent experiment and quantification of Figure 3E and 3F. The signal intensity of H3K27me3 in UTX-C or UTX-C+SV40NLS transfected cells was quantified. The values represent the mean of the individual transfectants. n= the total number of counted cells. The error bars represent one standard error from the mean. Statistics were performed using the Student's *t* test analysis.

### Figure S3.

An independent experiment and quantification of Figure 4C and D. The signals of the endogenous nuclear Jmjd3 and H3K27me3 in individual cells were plotted. n= the total numbers of counted cells. A.U.= arbitrary unit of fluorescence. R= correlation coefficient.

**Supplemental Table. 1 The sequences of oligonucleotide used in this study**

| Name                                 | Sequence                                |
|--------------------------------------|-----------------------------------------|
| Jmjd3 Full length Fwd BamHI          | AAGGGATCC ATGCATCGGGCAGTGGAC            |
| Jmjd3 Full length Rev XbaI           | ATATCTAGA TCATCGAGACGTGCTGGC            |
| Jmjd3-C Fwd BamHI                    | AAGGATCC CTCTTTGATTTCCCACCCACTC         |
| Jmjd3- N Rev XbaI                    | AATTCTAGA TCA CCGAATGGATTCATCCAGC       |
| Jmjd3 NLS1 K198A/R199A Mutant top    | GGGGGTTT CAGCAGATgcCgcCACTGGAGGGCCCC    |
| Jmjd3 NLS1 K198A/R199A Mutant bottom | GGGGGCCCTCCAGTGgcGgcATCTGCTGAACCCCC     |
| Jmjd3 NLS2 K228A/R229A Mutant top    | CCTTAGCCCTGGAGGCgcGgcCAGGAGAGGCTGCAGC   |
| Jmjd3 NLS2 K228A/R229A Mutant bottom | GCTGCAGCCTCTCCTGgcCgcGCCTCCAGGGCTAAGG   |
| UTX-C Fwd EcoRI                      | ATAGAATTC GTCCACTGGGCCTTCCCAGCATCTC     |
| UTX-C Rev XbaI                       | ATTTCTAGA TCAAGATGAGGCGGATGGTAATGGAGGAG |

The boldfaced letters and lowercase letters represent restriction enzyme sites and replaced nucleotides for mutagenesis, respectively.
